# Supplementary material for: Boosting the charge for the selective photoelectrochemical oxidation of hydroquinone in hazardous environments using a fine-tuned heterojunction catalyst
Source: Royal Society of Chemistry journal article supplement (doi:10.1039/d3ta07879e), 2024-01-01
Supplement: d3ta07879e1.pdf [file d3ta07879e1.pdf]

**Boosting the charge for selective photoelectrochemical oxidation of hydroquinone in  
hazardous environments using fine-tuned heterojunction catalyst**

**Mohamed G. Abdelkader<sup>a</sup>, Nada F. Atta<sup>a\*</sup>, Ahmed Galal<sup>a\*</sup>**

**Chemistry Department, Faculty of Science, Cairo University, 12613 Giza, Egypt**

**E-mail: galal@sci.cu.edu.eg**

**Supplementary Materials**

The SAED pattern of Figure 3C expresses the crystalline nature of the nanorods shown in Figure 3A. The indexing of the pattern resulted in the following cell parameters:  $a = 11.01 \text{ \AA}$ ,  $b = 11.94 \text{ \AA}$ ,  $c = 3.89 \text{ \AA}$  which are in acceptable agreement with the XRD results. The lattice spacing of 0.50 nm corresponds to the separation between two (200) planes. The nanorods preferentially grow along the (001) direction of the c-axis. Again the SAED data are in good agreement with those obtained from XRD measurements. The following indices of the planes deduced from the SAE pattern are: (130), (211), (221), (301) are identified.

**Supplement 1A. Bi<sub>2</sub>S<sub>3</sub> SAED analysis**

Figure 3F displays the SAED pattern of BiFeO<sub>3</sub> nanoparticles. The sharp diffraction spots indicate that the structure is crystalline in nature. The indexing of the pattern reflects the following line parameters:  $a = b = 5.67 \text{ \AA}$ ,  $c = 13.91 \text{ \AA}$  that are in good agreement with the data deduced from the XRD measurement. The interplanar spacing of 0.12 nm ascertains the presence of (012) plane diffraction fringe. The planes indices identified from the SAE pattern are: (113), (202), (024) and (211) planes.

**Supplement 1B. BiFeO<sub>3</sub> SAED Indexing table**

**Supplement 2.** Rietveld refinement pattern and the corresponding parameters using MAUD program for: BiFeO<sub>3</sub> (a); Bi<sub>2</sub>S<sub>3</sub> (b); and Bi<sub>2</sub>S<sub>3</sub>/BiFeO<sub>3</sub> heterojunction. Errors are reported in parentheses.

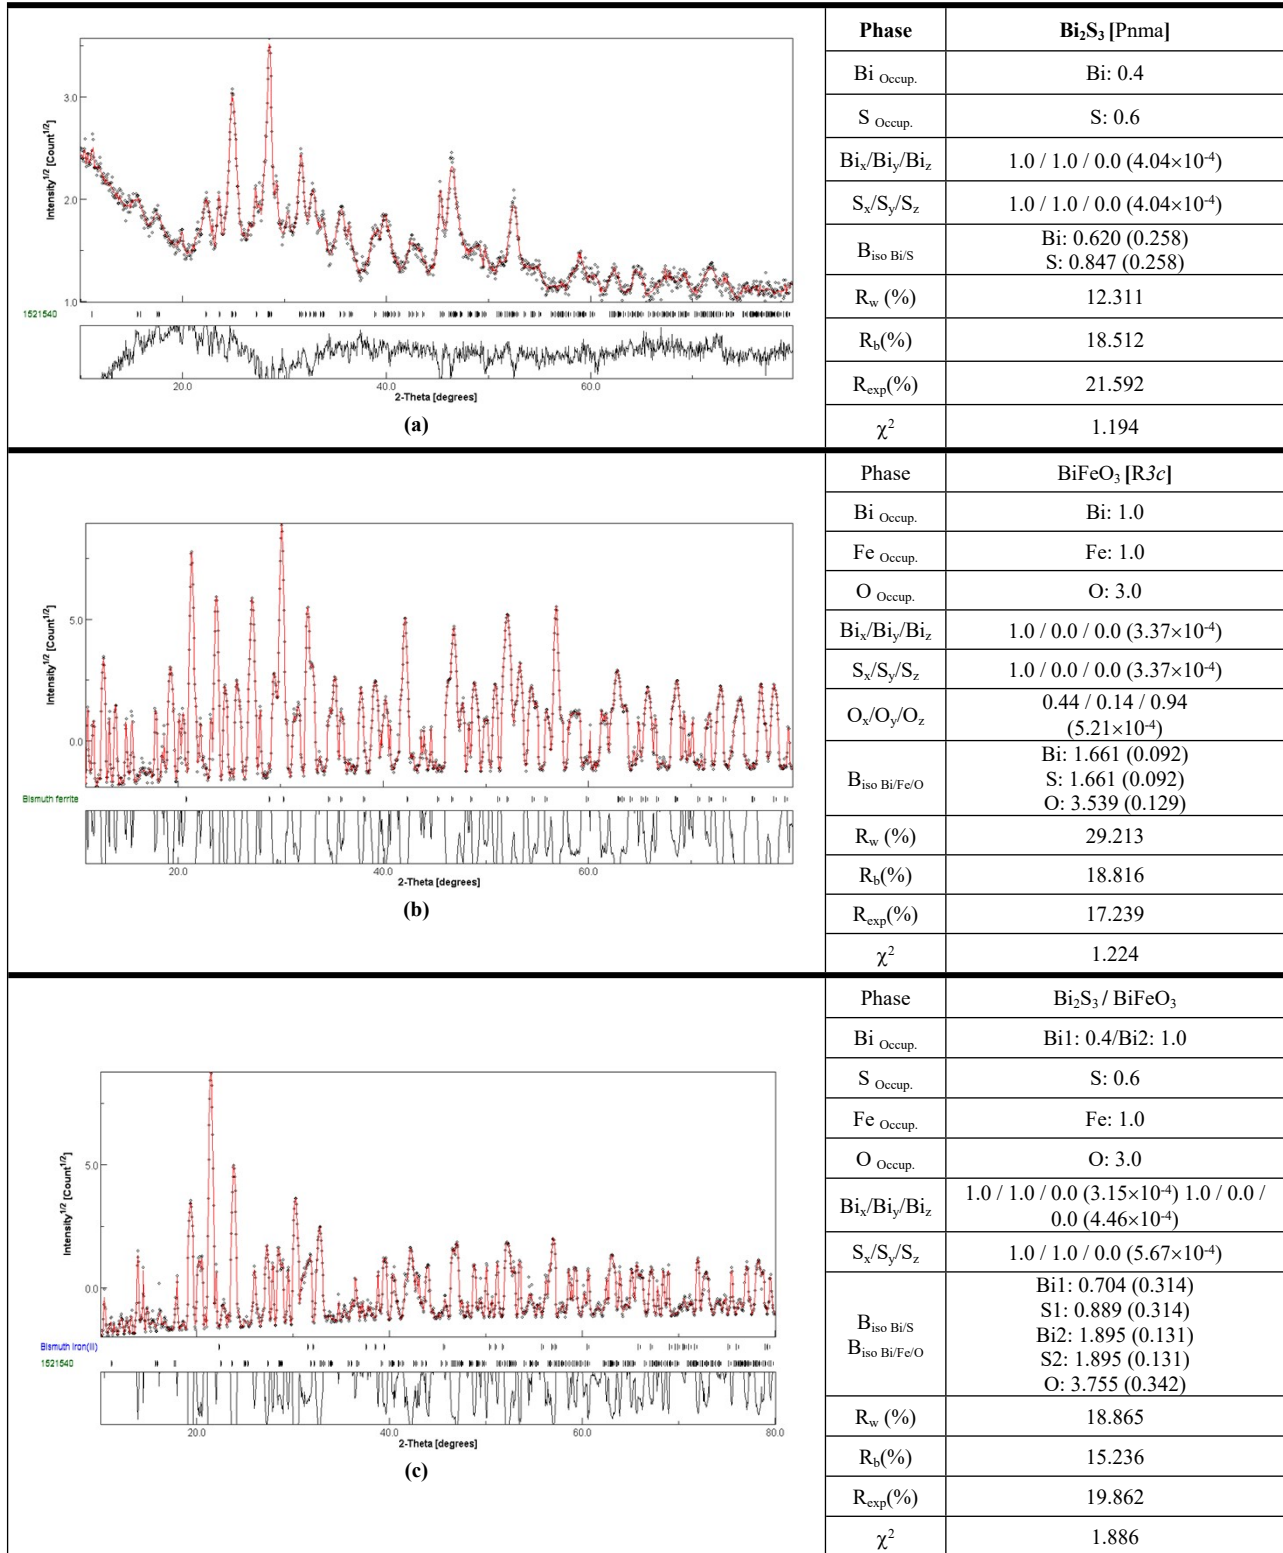

| Electrode                                                        | $E_{pa}$ (mV) | $I_{pa}$ ( $\mu\text{A}$ ) | $E_{pc}$ (mV) | $I_{pc}$ ( $\mu\text{A}$ ) |
|------------------------------------------------------------------|---------------|----------------------------|---------------|----------------------------|
| Pt                                                               | 611           | 247                        | 61            | 80                         |
| (Pt/BiFeO <sub>3</sub> -Bi <sub>2</sub> S <sub>3</sub> ) – Dark  | 637           | 283                        | 69            | 110                        |
| (Pt/BiFeO <sub>3</sub> -Bi <sub>2</sub> S <sub>3</sub> ) – Light | 657           | 388                        | –             | –                          |

**Supplement 3.** Electrochemical data from the CVs of Figure 1; the scan rate: 50 mV.s<sup>-1</sup> in 1 mM HQ/0.1 M H<sub>2</sub>SO<sub>4</sub>. Light source: Optical intensity is 30 mW.cm<sup>-2</sup>; Operating current intensity is 700 mA. All potentials are listed in reference to Ag/AgCl electrode.

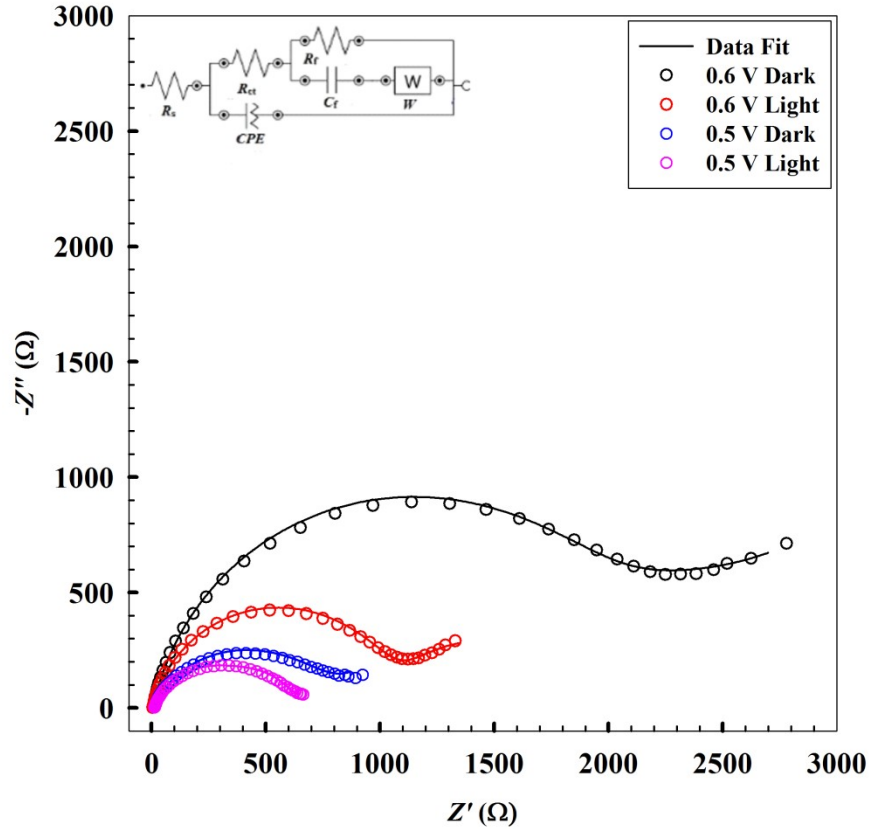

**Supplement 4.** Nyquist plots showing the effect of applied potential in presence and absence of light exposure

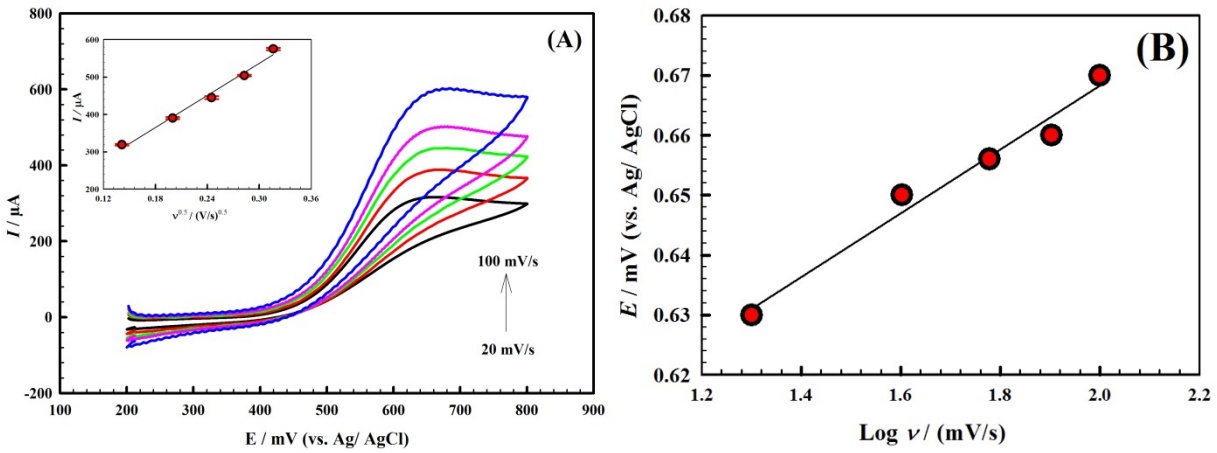

**Supplement 5. A:** Effect of increasing the scan rate on the cyclic voltammetry response of the  $\text{Bi}_2\text{S}_3/\text{BiFeO}_3$  electrode in dark and under illumination (Inset: Relation between oxidation peak current of HQ and square root of scan rate); **B:** Relation between oxidation peak potential of HQ and log scan rate. Electrolyte: 0.05 M HQ in 0.1 M  $\text{H}_2\text{SO}_4$

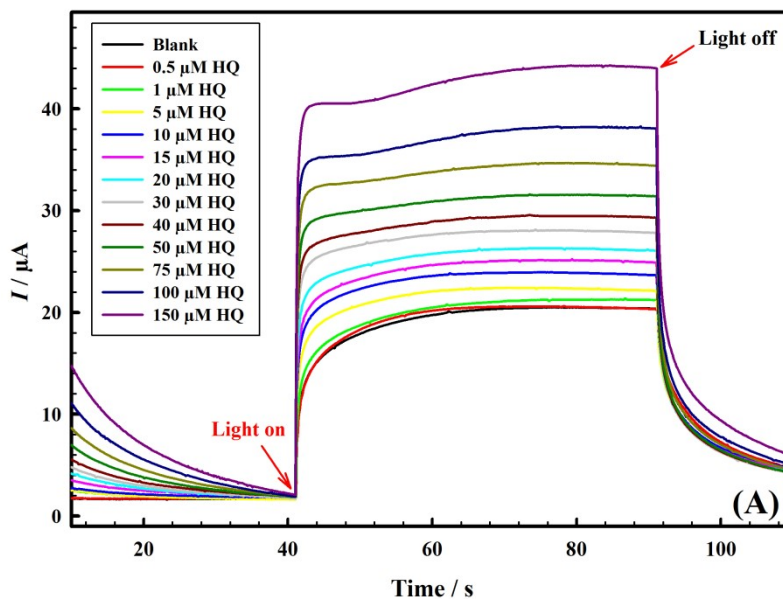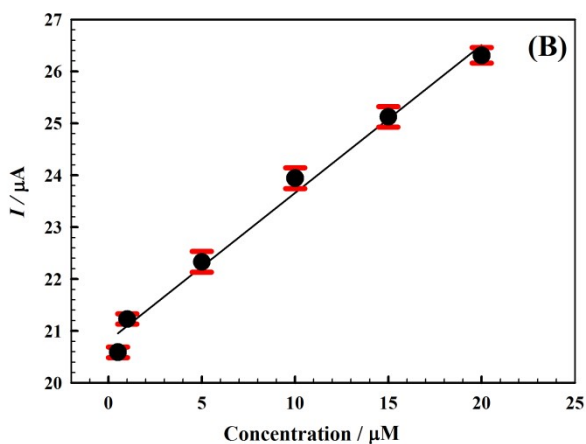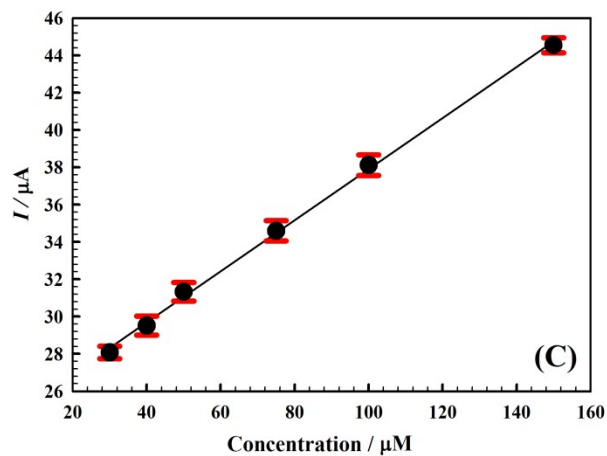

**Supplement 6. (A):** Amperometric response of  $\text{Bi}_2\text{S}_3/\text{BiFeO}_3$  electrode under illumination upon successive addition of HQ batch concentrations from 0.5  $\mu\text{M}$  to 150  $\mu\text{M}$  (under illumination); **(B):** Calibration curve for HQ in the concentrations from 0.5 to 20  $\mu\text{M}$ ; **(C):** Calibration curve for HQ in the concentrations from 30 to 100  $\mu\text{M}$ . Electrolyte: 0.1 M  $\text{H}_2\text{SO}_4$ ; Applied potential 0.65 V.

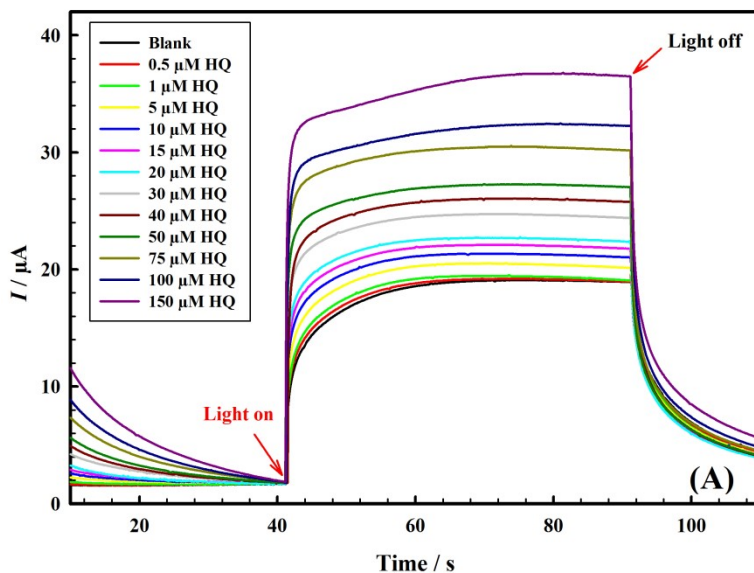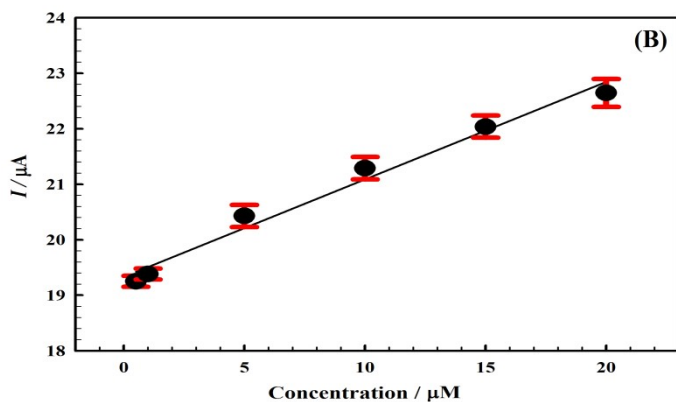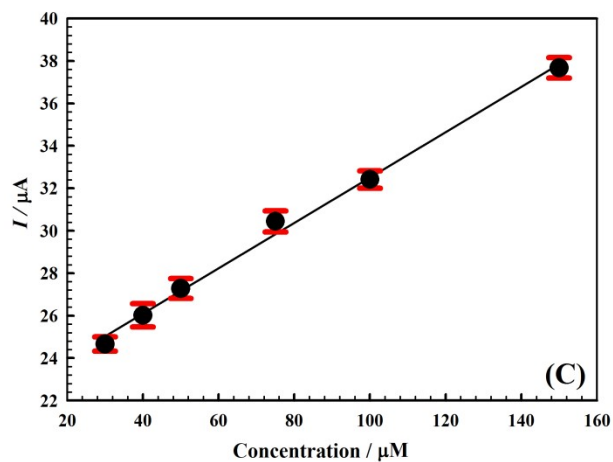

**Supplement 7. (A):** Amperometric response of  $\text{Bi}_2\text{S}_3/\text{BiFeO}_3$  electrode under illumination upon successive in HQ/tap water batch concentrations from 0.5  $\mu\text{M}$  to 150  $\mu\text{M}$  (under illumination); **(B):** Calibration curve for HQ in the concentrations from 0.5 to 20  $\mu\text{M}$ ; **(C):** Calibration curve for HQ in the concentrations from 30 to 150  $\mu\text{M}$ . Electrolyte: 0.1 M  $\text{H}_2\text{SO}_4$ ; Applied potential 0.65 V.

| <b>Concentration Added (<math>\mu\text{M}</math>)</b> | <b>Concentration Found (<math>\mu\text{M}</math>)</b> | <b>Standard Error</b> | <b>SD</b> | <b>RSD (%)</b> | <b>Recovery</b> |
|-------------------------------------------------------|-------------------------------------------------------|-----------------------|-----------|----------------|-----------------|
| 10                                                    | 10.252                                                | 0.126                 | 0.178     | 1.779          | 102.516         |
| 20                                                    | 19.765                                                | 0.117                 | 0.166     | 0.830          | 98.827          |
| 50                                                    | 51.109                                                | 0.554                 | 0.784     | 1.568          | 102.217         |
| 100                                                   | 99.110                                                | 0.445                 | 0.630     | 0.630          | 99.110          |

**Supplement 8.** Recovery data of HQ in tap water as derived from results in supplement 7

| <b>Conc. Added (<math>\mu\text{M}</math>)</b> | <b>Conc. Found (<math>\mu\text{M}</math>)</b> | <b>Standard Error</b> | <b>SD</b> | <b>RSD%</b> | <b>Recovery</b> |
|-----------------------------------------------|-----------------------------------------------|-----------------------|-----------|-------------|-----------------|
| 10                                            | 10.107                                        | 0.0533                | 0.075     | 0.754       | 101.067         |
| 20                                            | 19.440                                        | 0.280                 | 0.396     | 1.980       | 97.200          |
| 50                                            | 50.773                                        | 0.387                 | 0.547     | 1.094       | 101.547         |
| 100                                           | 99.780                                        | 0.110                 | 0.156     | 0.156       | 99.780          |

**Supplement 9.** Recovery data of HQ concentrations in sewage wastewater

| <b>Conc. Added (<math>\mu\text{M}</math>)</b> | <b>Conc. Found (<math>\mu\text{M}</math>)</b> | <b>Standard Error</b> | <b>SD</b> | <b>RSD%</b> | <b>Recovery</b> |
|-----------------------------------------------|-----------------------------------------------|-----------------------|-----------|-------------|-----------------|
| 10                                            | 9.696                                         | 0.152                 | 0.215     | 2.150       | 96.962          |
| 20                                            | 20.700                                        | 0.350                 | 0.495     | 2.477       | 103.503         |
| 50                                            | 49.434                                        | 0.283                 | 0.400     | 0.800       | 98.870          |
| 100                                           | 100.177                                       | 0.089                 | 0.125     | 0.125       | 100.177         |

**Supplement 10.** Recovery data of HQ in industrial wastewater dump



| Electrode                                              | Technique                                    | Medium                                                                                 | LOD ( $\mu\text{M}$ )                   | Sensitivity ( $\mu\text{A}/\mu\text{M}$ ) | Linear range ( $\mu\text{M}$ ) | Applied in            | Ref              |
|--------------------------------------------------------|----------------------------------------------|----------------------------------------------------------------------------------------|-----------------------------------------|-------------------------------------------|--------------------------------|-----------------------|------------------|
| ZnO/Co <sub>3</sub> O <sub>4</sub> /MCPE               | CV                                           | 0.2 M PBS<br>pH = 7.4                                                                  | 3.22                                    | Not mentioned                             | 10-100                         | Tap water             | [84]             |
| MNi/GCE                                                | DPV                                          | 0.1 M PBS<br>pH = 7                                                                    | 5.3                                     | 0.2871                                    | (0.03-3)<br>(3-15)             | River and waste water | [85]             |
| PPy/CB/ZnO/GCE                                         | Amperometry                                  | 0.1 M PBS<br>pH = 7                                                                    | 0.0229                                  | 0.5405 (low range)<br>0.3006 (high range) | (0.9-772)<br>(772-6528)        | Tap water             | [86]             |
| AuNPs/ITO                                              | Irradiated Amperometry                       | 0.1 M PBS<br>pH = 7                                                                    | 0.1                                     | 0.0743                                    | 0.25-150                       | Not applied           | [87]             |
| Gr-SiNWs-Si/Pt                                         | Irradiated Amperometry (at 0 bias)           | 0.1 M PBS<br>pH = 7                                                                    | 0.3                                     | 0.36                                      | 10-300                         | Not applied           | [88]             |
| FeC <sub>4</sub> Pc@TiO <sub>2</sub>                   | PEC<br>Cronoamperometry                      | 0.1 M PBS<br>pH = 3                                                                    | 0.078                                   | -0.00151                                  | 0.2-78                         | River water           | [89]             |
| CSS/SPE                                                | PEC<br>Cronoamperometry                      | 0.1 M Na <sub>2</sub> C <sub>2</sub> O <sub>2</sub><br>pH = 7.18                       | 2.7                                     | 0.07                                      | 3-23                           | Tap water             | [46]             |
| CdS/SnS <sub>2</sub> /CNTs                             | PEC<br>Cronoamperometry                      | 0.1 M PBS<br>pH = 7                                                                    | 0.1                                     | 0.446 (low range)<br>0.073 (high range)   | (0.2-4)<br>(4-100)             | Tap and lake water    | [47]             |
| BiPO <sub>4</sub> -GQD <sub>s, 0.1</sub> /ITO          | Signal off PEC<br>Cronoamperometry           | 0.1 M PBS<br>pH = 7                                                                    | 0.034                                   | -0.0647                                   | 0.05-3                         | River water           | [45]             |
| BiFeO <sub>3</sub> -Bi <sub>2</sub> S <sub>3</sub> /Pt | PEC<br>Cronoamperometry (Irradiation on/off) | 0.1 M H <sub>2</sub> SO <sub>4</sub>                                                   | 0.038                                   | 0.285 (low range)<br>0.137 (high range)   | (0.5-20)<br>(30-150)           |                       | <b>This work</b> |
|                                                        |                                              | Tap water with 0.1 M H <sub>2</sub> SO <sub>4</sub> supporting electrolyte             | 0.046                                   | 0.176 (low range)<br>0.107 (high range)   | (0.5-20)<br>(30-150)           | Tap water             |                  |
|                                                        | Irradiated Amperometry                       | 0.1 M H <sub>2</sub> SO <sub>4</sub>                                                   | 0.00273                                 | 14.9 (low range)<br>0.463 (high range)    | (0.025-0.5)<br>(1-100)         |                       |                  |
|                                                        | Dark Amperometry                             | 0.1 M H <sub>2</sub> SO <sub>4</sub>                                                   | 0.0492                                  | 0.239                                     | (0.1-100)                      |                       |                  |
|                                                        |                                              | Sewage water with 0.1 M H <sub>2</sub> SO <sub>4</sub> supporting electrolyte          | 0.132 (low range)<br>0.401 (high range) | 0.150                                     | (10-100)                       | Sewage water          |                  |
|                                                        |                                              | Industrial dump water with 0.1 M H <sub>2</sub> SO <sub>4</sub> supporting electrolyte | 0.121 (low range)<br>0.366 (high range) | 0.164                                     | (10-100)                       | Industrial dump water |                  |

CSS/SPE: Carbon spherical shell / screen printed electrode

Gr-SiNWs-Si/Pt: Graphene / silicon nanowires decorated with n-silicon/platinum(Si-Pt)

FeC<sub>4</sub>Pc@TiO<sub>2</sub>: Anatase TiO<sub>2</sub> nanoparticles with iron(III) tetracarboxyl phthalocyanine

MCPE: Modified carbon paste electrode

MNi/GCE: Mesoporous nickel / glassy carbon

PPy/CB/ZnO/GCE: Polypyrrole-carbon black doped ZnO / glassy carbon

**Supplement 11.** Comparison of figures of merits of different sensors and PEC sensors in the previously reported literature to the present proposed sensor in this work

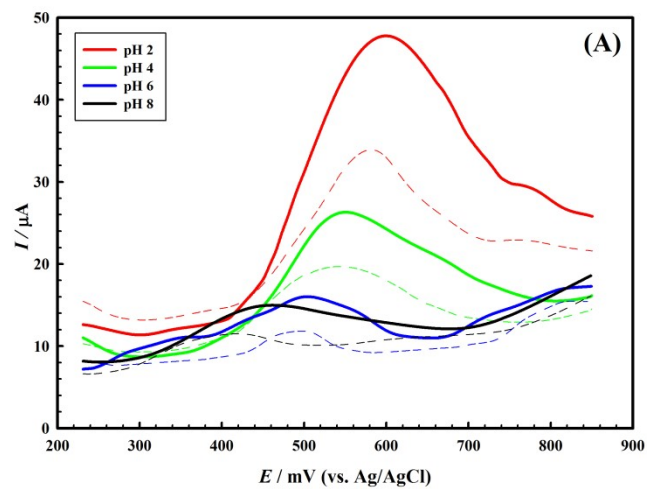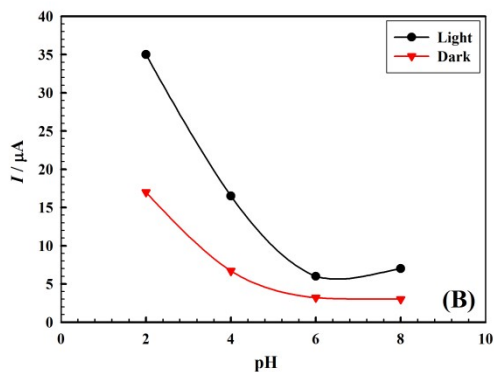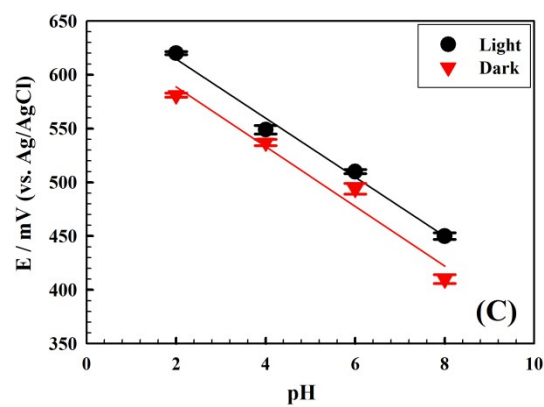

**Supplement 12. (A):** Effect of changing the pH of supporting electrolyte on the linear sweep voltammograms of the Bi<sub>2</sub>S<sub>3</sub>/BiFeO<sub>3</sub> electrode for the oxidation of HQ under illumination and in dark; **(B):** The relations between the PEC current under illumination and in dark at different pH values; **(C):** The relations between the oxidation potential values of HQ in different pH values.

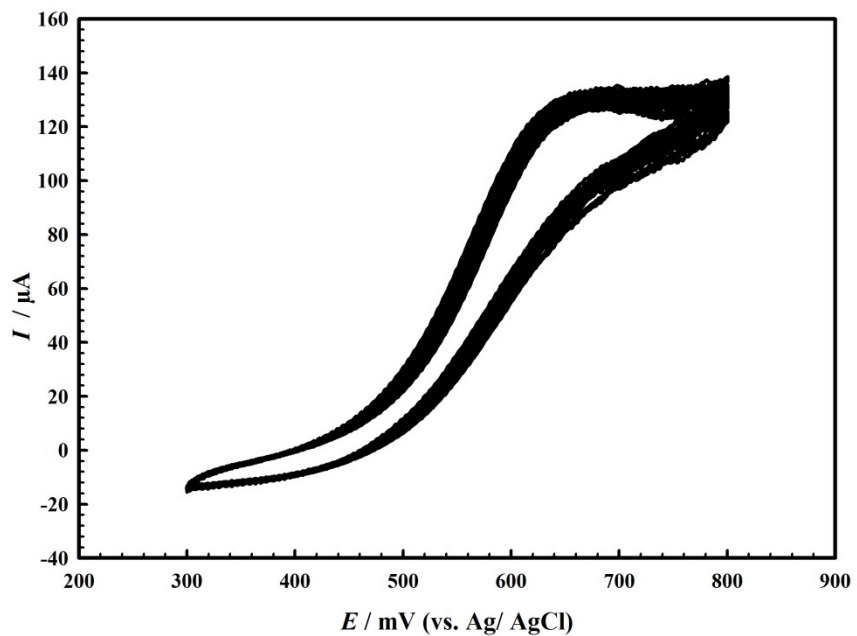

**Supplement 13.** Effect of repeated cycles of the voltammograms (40 cycles) of the  $\text{Bi}_2\text{S}_3/\text{BiFeO}_3$  electrode under illumination in 0.05 M HQ in 0.1 M  $\text{H}_2\text{SO}_4$  showing the stability of the PEC catalyst

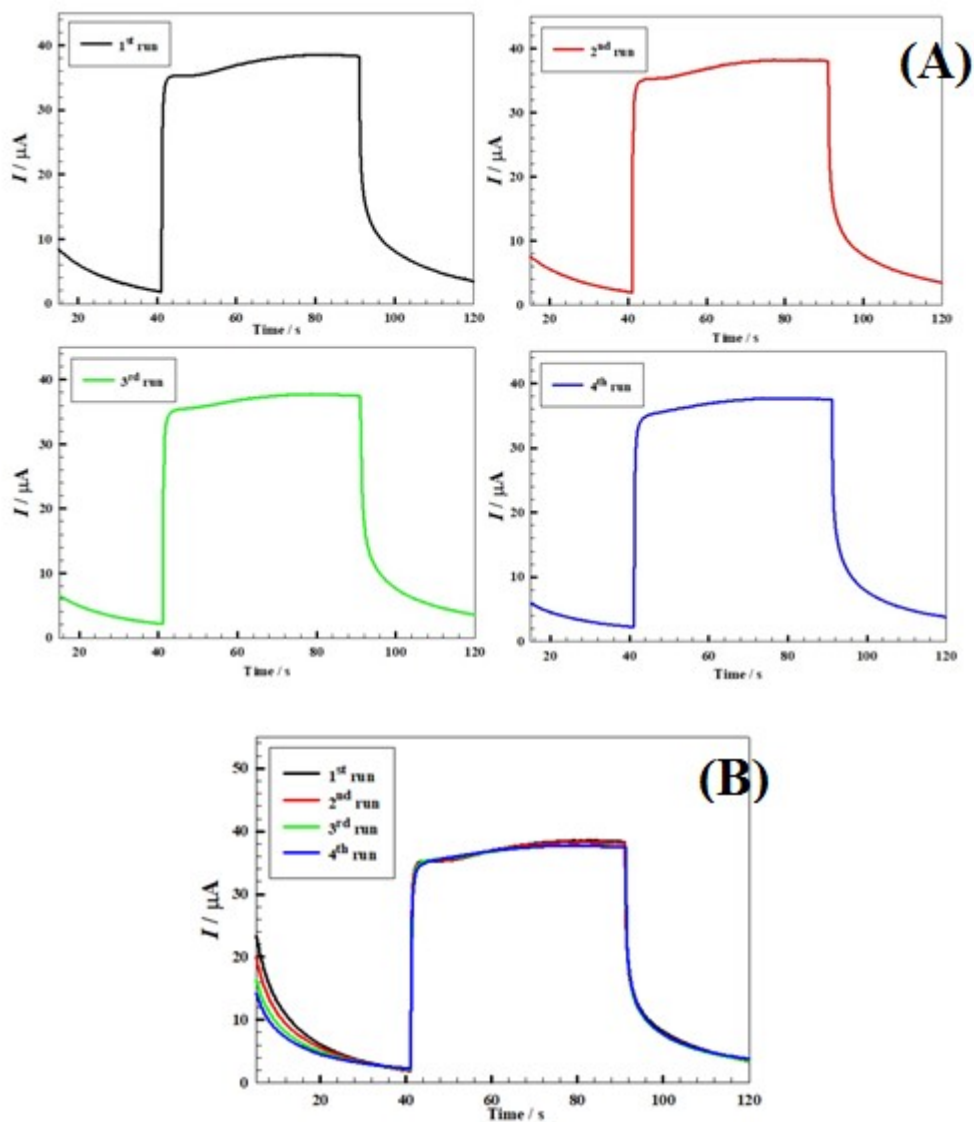

**Supplement 14.** Evaluation of the reusability of the PEC ( $\text{Bi}_2\text{S}_3/\text{BiFeO}_3$ ).

**(A):** Chronoamperometry graphs of inter-day intervals (2 days apart), the same PEC is used in freshly prepared 100  $\mu\text{M}$  HQ in 0.1 M  $\text{H}_2\text{SO}_4$ ; **(B):** The overlay of the four runs shows the stability of the PEC reusability.
